# Supplementary material for: The Drosophila MAST kinase Drop out is required to initiate membrane compartmentalisation during cellularisation and regulates dynein-based transport
Source: PubMed Central journal article supplement (PMC4011086; doi:10.1242/dev.104711), 2014-05
Supplement: supp_141.10.2119_DEV104711.pdf [file supp_141.10.2119_DEV104711.pdf]

## **Supplementary Material**

**The *Drosophila* MAST kinase Drop out is required to initiate membrane compartmentalisation during cellularisation and regulates dynein-based transport**

SUPPLEMENTARY MATERIAL

**Daniel Hain<sup>1</sup>, Alistair Langlands<sup>1</sup>, Hannah C. Sonnenberg<sup>1</sup>, Charlotte Bailey<sup>1</sup>, Simon L. Bullock<sup>2</sup> and H.-Arno J. Müller<sup>1</sup>**

1 Division of Cell and Developmental Biology, College of Life Sciences, University of Dundee, Scotland

2 Division of Cell Biology, MRC Laboratory of Molecular Biology, Francis Crick Avenue, Cambridge Biomedical Campus, Cambridge CB2 0QH, UK

## Supplementary Material

### Figure S1: Genetics of the *dop* locus.

The *dop* locus was genetically mapped to chromosome 3L in cytological band 71E1 (Meyer et al., 2006), but initially misidentified as an allele of *Argonaute 2* (Meyer et al., 2006; Hain et al., 2010). **(A)** The genomic breakpoints of non-complementing chromosomal deletions were determined to map *dop*. Break points of *Df(3L)XG9*, *Df(3L)MR15* and *Df(3L)MR20* are indicated by black bars. *MR15* and *MR20* were mapped by PCR only and breakpoints are located within the grey areas. *XG9* breakpoints have been determined by sequencing of genomic DNA as in 15524158 and 15659132, respectively. *Df(3L)XG9* is predicted to uncover the apparent lethal P-element insertion *P{lacW}I(3)s1754*, which resides at 15554702 and within the first exon of *CG7427*. Amplification of genomic DNA of the *CG7427* locus by PCR confirmed that *Df(3L)XG9* does uncover this gene. Since, as previously reported (Meyer et al., 2006) *P{lacW}I(3)s1754* does complement *Df(3L)XG9*, we conclude that the lethality associated with the *P{lacW}I(3)s1754* chromosome must be located elsewhere on the third chromosome. These results have been communicated to Flybase to correct the annotation of *P{lacW}I(3)s1754* (<http://flybase.org/reports/FBBrf0222642.html>). **(B)** Cartoon of the domain composition of *Drosophila* and human microtubule-associated Ser/Thr kinases (MAST).

### Figure S2: Distribution of Dop-HA and GFP in syncytial divisions.

Dop-HA or Dop-GFP were expressed maternally using one copy of the *nos-Gal4* driver. **(A)** Dop-HA expressing embryos were fixed and immunostained with antibodies against HA (red) and for DNA using DAPI (blue). Slightly higher levels of Dop-HA immunostaining is associated with the mitotic spindle. **(B)** Still images of a time-lapse recording demonstrating the dynamic movement of Dop-GFP in syncytial blastoderm stages. Similar to Dop-HA, during M-phase, higher levels of Dop-GFP can be observed to associate with the area where the mitotic spindle is localised.

## Supplementary Material

### **Figure S3: Failure in separation of Dlg and Slam positive cortical domains.**

Embryos at mid-cellularisation were fixed and stained with antibodies against the furrow canal marker SLAM (green), the lateral membrane marker Dlg (red) and DAPI for DNA (blue). In wild type, Dlg-positive membrane cortex is clearly separated and does not extend into the Slam-positive cortex (arrow heads). In embryos derived from *dop[1]* homozygous mothers, Dlg domain extends into and overlaps with the Slam-positive domain (arrow heads).

**Figure S4: Normalised representation of Figure 2E.** Optical transversal section of wild-type and *dop*<sup>1</sup> mutant embryos expressing Baz::GFP under control of *mat-tub::Gal4* during cellularisation. The brightness of the wild type panel was increased to match saturation levels of the *dop*<sup>1</sup> panel. Arrows point out the position of the cellularisation front. Basal signal of Baz-GFP in *dop*<sup>1</sup> mutant embryos is retained after cellularisation completes. Numbers indicate the time (min:sec) after initiation of cellularisation. The scale bars are 10 µm long.

### **Figure S5: Tubulin localisation in wild-type and *dop* mutants.**

Microtubules in wild type (A-D) and embryos derived from *dop*<sup>1</sup> (E-H) homozygous mothers. Embryos were fixed in 37% formaldehyde and stained with anti β-Tubulin antibody (red; DNA is shown by DAPI staining in blue). To avoid bias during immunolabelling procedures, embryos were treated all the same and wild type and mutants were stained in together in one tube. Wild type embryos were discriminated from *dop* mutant embryos by pre-staining with anti-Vasa antibodies, which labels the primordial germ cells (I,J; green). Embryos were recorded by confocal microscopy with identical settings. Progressive stages during cellularisation are shown (arrowheads indicate the position of the furrow canals): (A,E) syncytial blastoderm; (B,F) early cellularisation (beginning of slow phase); (C,G) mid cellularisation (end of slow phase). (D,H) late cellularisation (fast phase). (A, E) In syncytial stages wild-type and *dop*<sup>1</sup> embryos do not show any difference. (B,F) During the early cellularisation wild-type embryos show

## Supplementary Material

microtubule bundles, which arranged in typical basket-like structures surrounding the nucleus and thin filaments reaching into the yolk (arrows in B). *dop*<sup>1</sup> embryos (a severe example is shown in F) at a comparable stage show irregular arrangement of microtubule bundles (F). However, nuclei are surrounded by the basket-like microtubules arrays even if they detach from the membrane.

(C,G) At mid cellularisation wild type with *dop*<sup>1</sup> embryos exhibit a similar pattern. *dop*<sup>1</sup> embryos with lower amount of nuclear detachment as shown here exhibits very similar microtubule staining as the wild type.(D,H) At late cellularisation stages embryos in both classes show long microtubule bundles reaching into the basal cytoplasm.

### Movie 1: Dop-GFP in syncytial divisions.

Dop-GFP was expressed maternally using *nos*-Gal4 and surface fluorescence in living embryos was measured using confocal microscopy. In S-phase Dop-GFP is cytoplasmic. During M-Phase Dop-GFP dynamically associated with a structure surrounding the mitotic spindle.

### Movie 2: Dop-GFP in syncytial divisions and cellularisation.

Dop-GFP was expressed maternally using *nos*-Gal4 and fluorescence in living embryos was measured using confocal microscopy. The movie shows a transversal view of an embryo during mitotic cycle 12, 13 and the slow phase of cellularisation. Dop-GFP is dynamically associated with the area of the mitotic spindles. At the onset of cellularisation Dop-GFP is slightly enriched in the domain apical of the nuclei.

### Movie 3: Baz-GFP wt and *dop*<sup>1</sup>.

UAS:Baz-GFP expressed by *mat15*:Gal4 (left) and UAS:Baz-GFP expressed by embryos from flies of the genotype UAS:Baz-GFP/*mat67*;*dop*<sup>10</sup>/*dop*<sup>1</sup> (right). Imaging speed was 6 time points per min. Transversal sections of the embryos are shown.

## Supplementary Material

### **Movie 4: E-cadherin GFP in wild type.**

Ubiquitously expressed E-Cadherin-GFP in wild type genetic background. Imaging speed was 2 time points per minute with a stack size of 9  $\mu\text{m}$ . The movie shows a maximum intensity projection of the z-data.

### **Movie 5: E-cadherin GFP in *dop*<sup>1</sup> mutant.**

Ubiquitously expressed E-Cadherin-GFP in embryo derived from *dop*<sup>1</sup>/*dop*<sup>1</sup> females. Imaging speed was 2 time points per min. with a stack size of 9  $\mu\text{m}$ . The movie shows a maximum intensity projection of the z-data.

### **Movie 6: Baz-GFP wt and *dop*<sup>1</sup>.**

UAS:Baz-GFP expressed by *mat15:Gal4* (left) and UAS:Baz-GFP expressed by embryos from flies of the genotype *UAS:Baz-GFP/mat67;dop*<sup>10</sup>/*dop*<sup>1</sup> (right). Imaging speed was 6 time points per min. Surface views are shown. For display 8  $\mu\text{m}$  z-stacks were recorded and displayed as maximum intensity projection.

### **Movie 7: Movement of *hairy* mRNA particles in wild-type embryo.**

Alexa488-labelled capped RNA corresponding to the *Drosophila hairy* 3'UTR was synthesised and injected into cycle 14 blastoderm embryos derived from Oregon R wild type strain. Images were captured every 297 msec using spinning disk microscopy.

### **Movie 8: Movement of *hairy* mRNA particles in *dop*<sup>1</sup> mutant.**

Alexa488-labelled capped RNA corresponding to the *Drosophila hairy* 3'UTR was synthesised and injected into cycle 14 blastoderm embryos derived from *dop*<sup>1</sup> homozygous females. Images were captured every 297 msec using spinning disk microscopy.

**Movie 9: Rab11-GFP in wild-type embryo at onset of cellularisation.** For Movies S14 to S17 imaging conditions and all settings were identical. Imaging

## **Supplementary Material**

speed was 12 time points per min at a total of 2 min recording, 25 time points in total. Single z-planes are shown. Exposure time was 200 ms. Every time point was taken by an average of 4.

### **Movie 10: Rab11-GFP in wild-type embryo during slow phase.**

Note dynamics of Rab11 endosome membranes from the centrosomal area to the periphery.

### **Movie 11: Rab11-GFP in dop[1]/dop[10] embryo at onset of cellularisation.**

Note high accumulation of Rab11 endosome membranes to the centrosomal area compared to wild type.

### **Movie 12: Rab11-GFP in dop[1]/dop[10] embryo during slow phase.**

Note high accumulation of Rab11 endosome membranes to the centrosomal area compared to wild type.

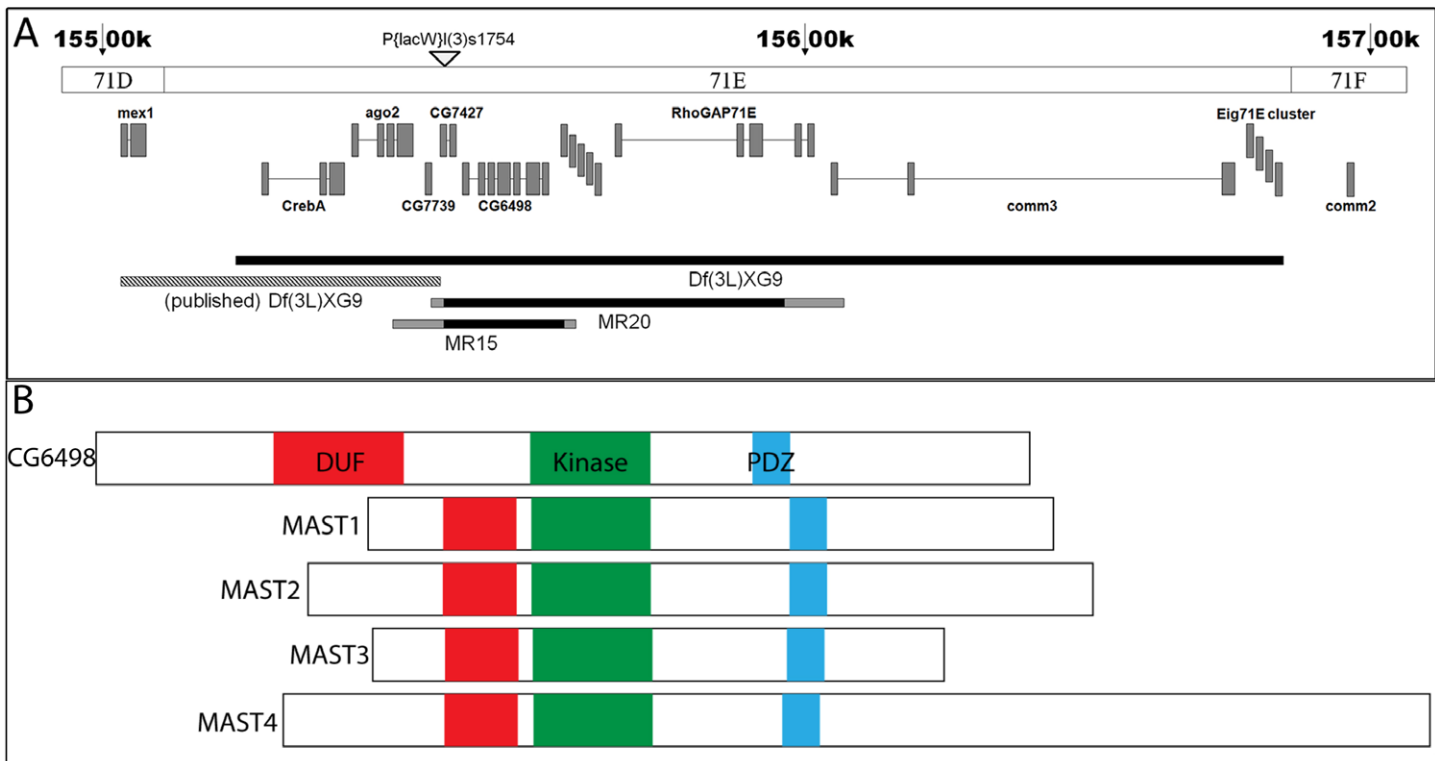

Figure S1

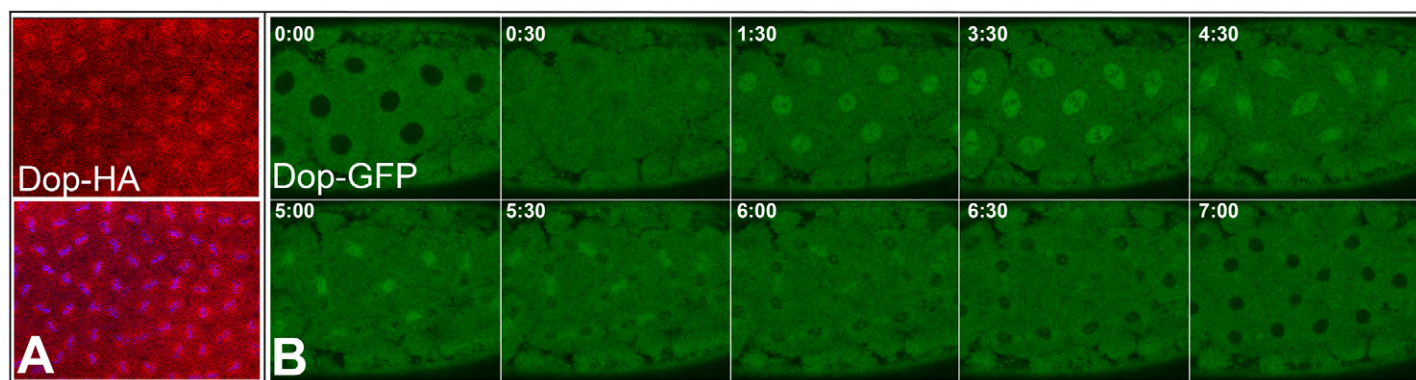

Figure S2

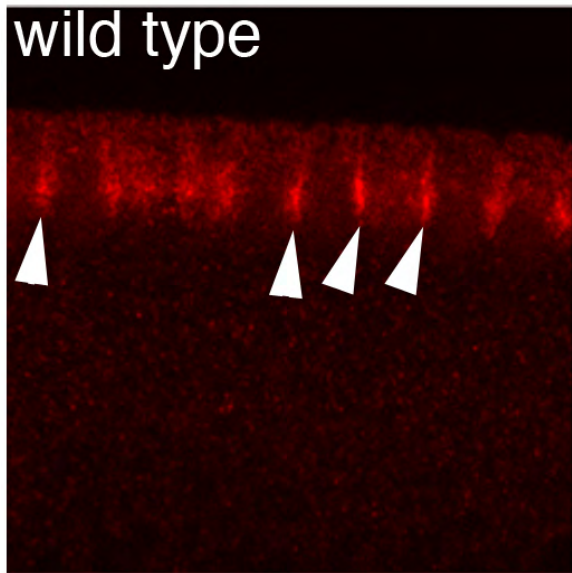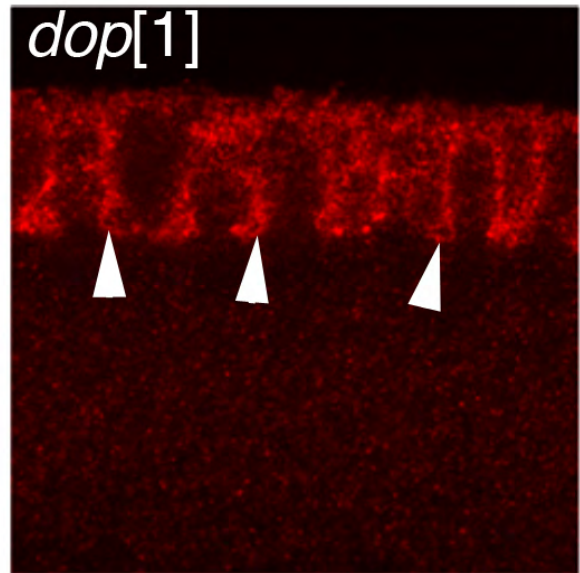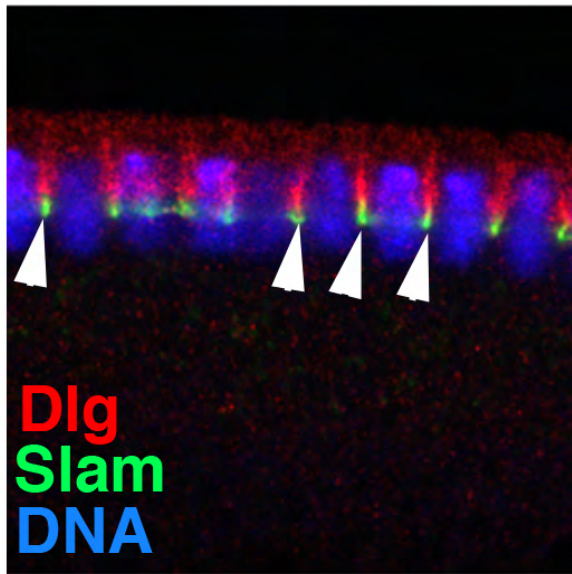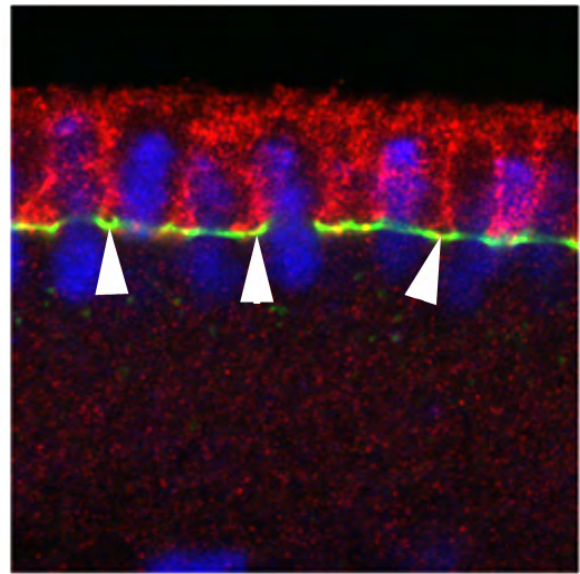

Figure S3



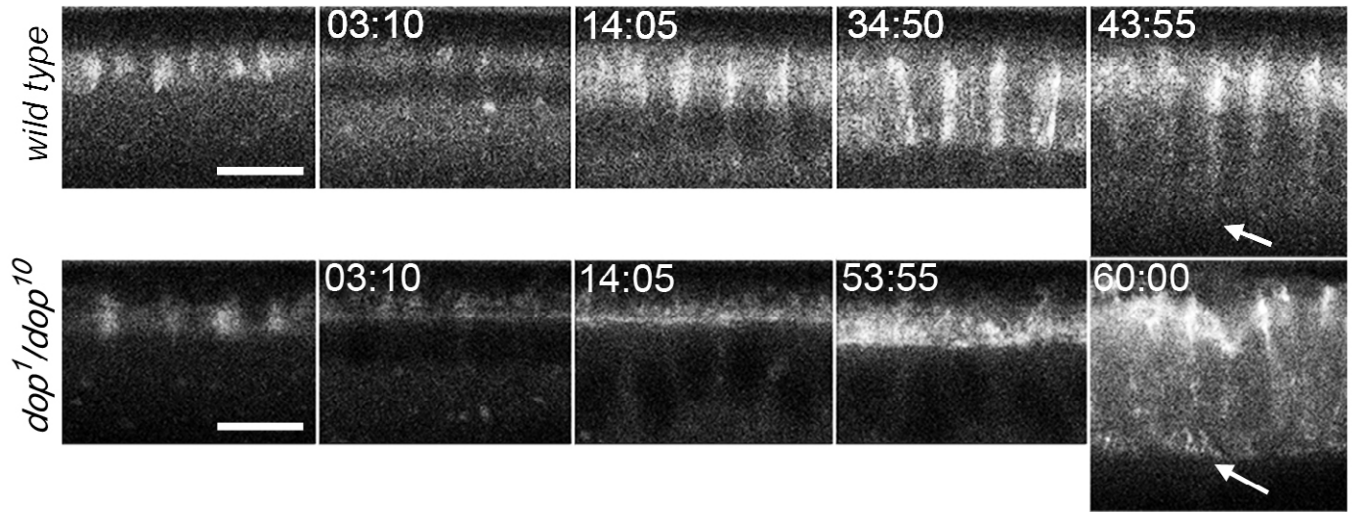

Figure S4

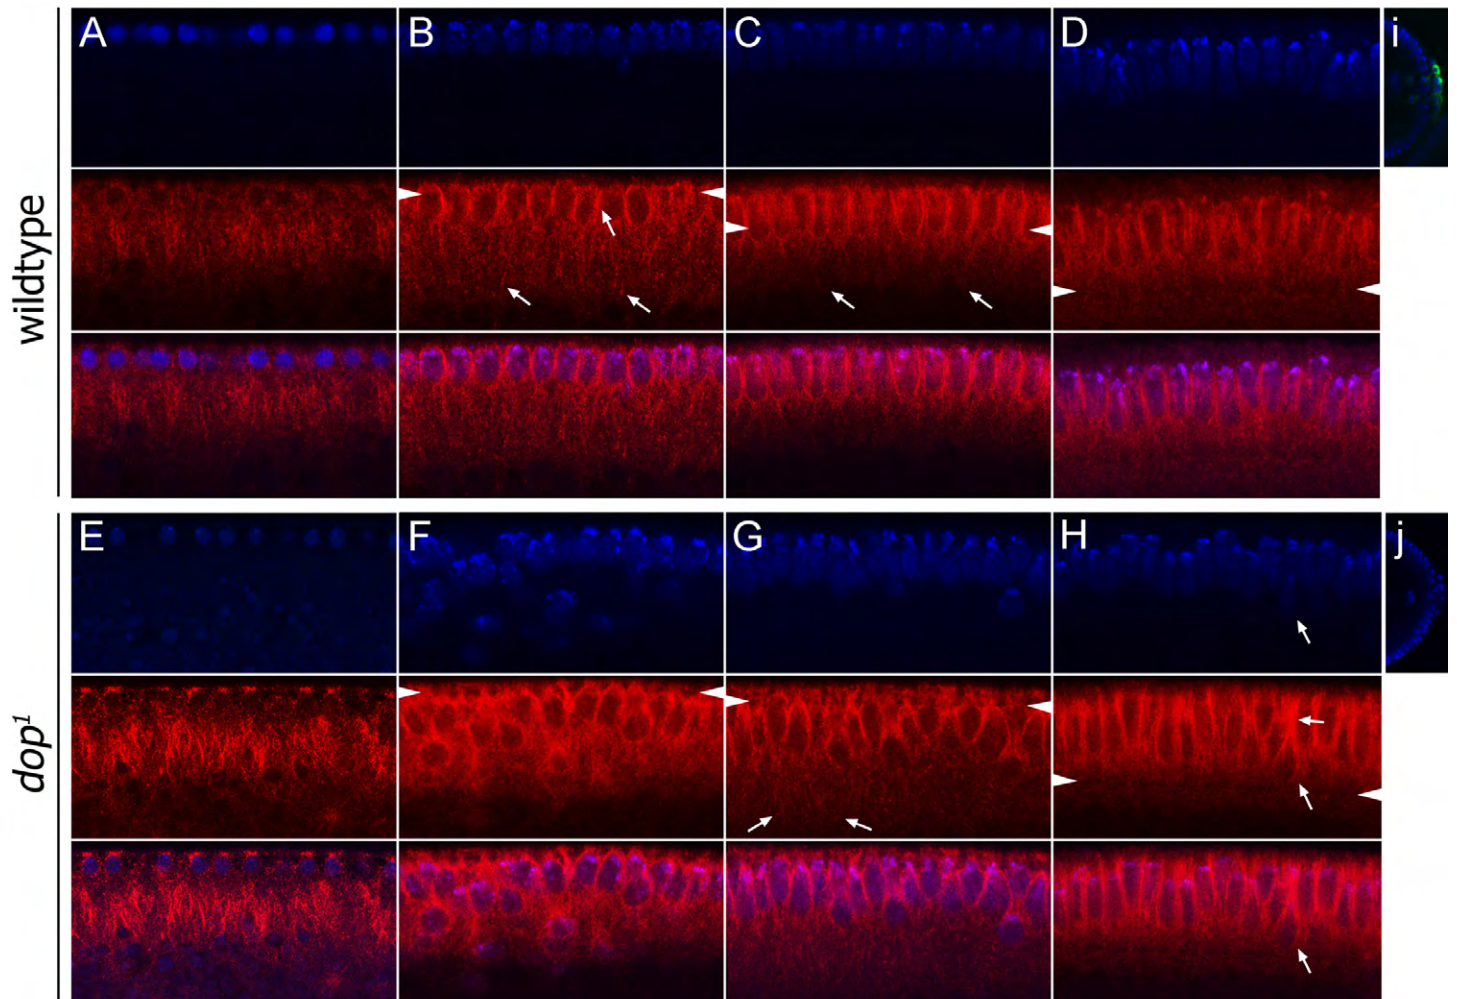

Figure S5

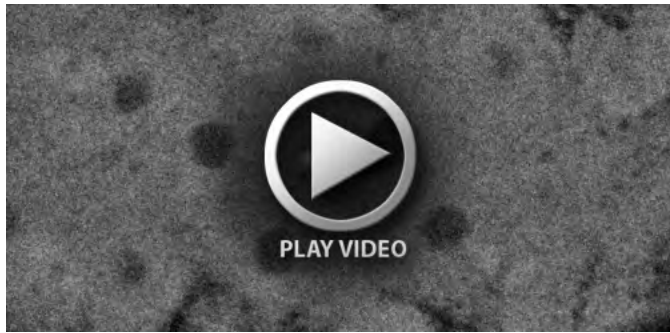

**Movie 1.**

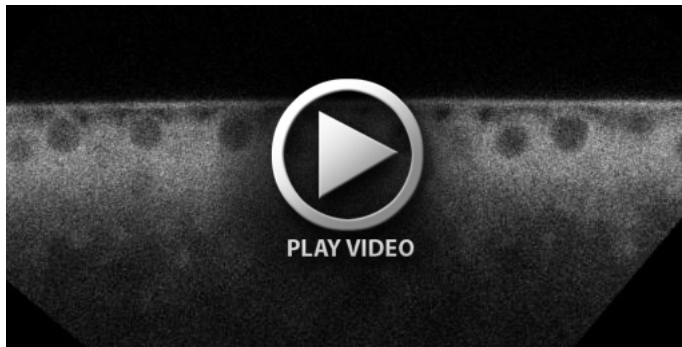

**Movie 2.**

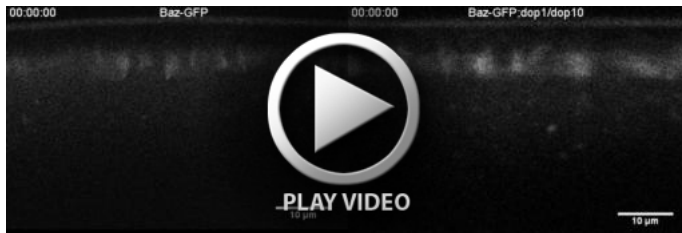

**Movie 3.**

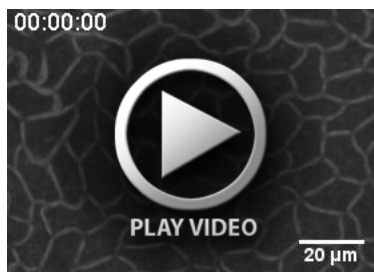

**Movie 4.**

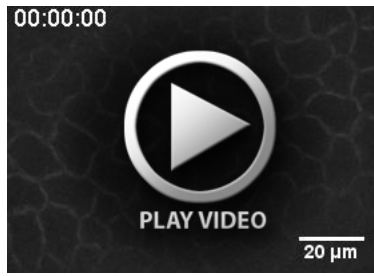

**Movie 5.**

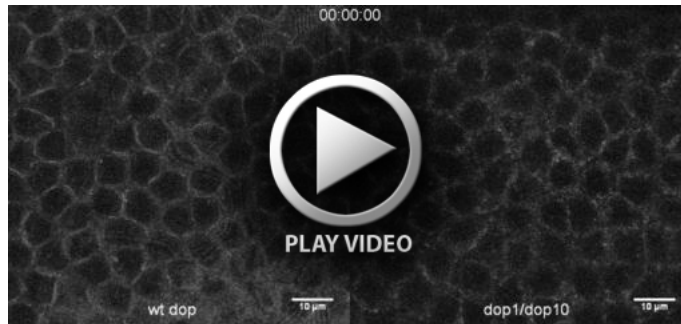

**Movie 6.**

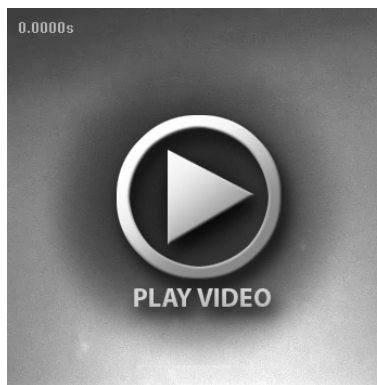

**Movie 7.**

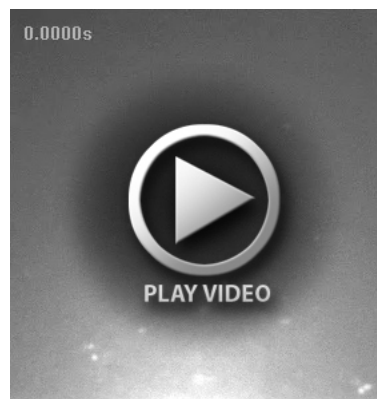

**Movie 8.**

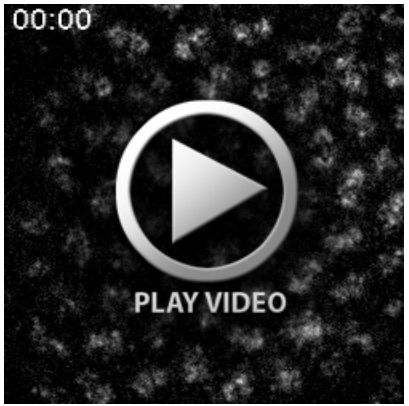

**Movie 9.**

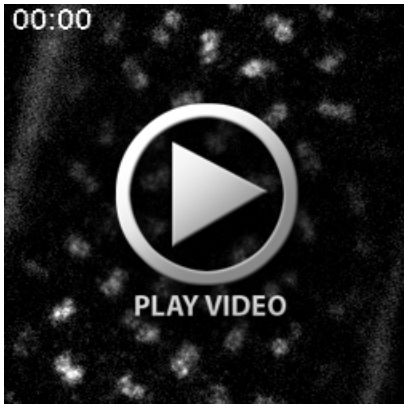

**Movie 10.**

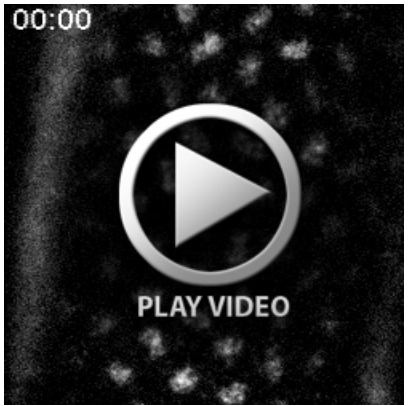

**Movie 11.**

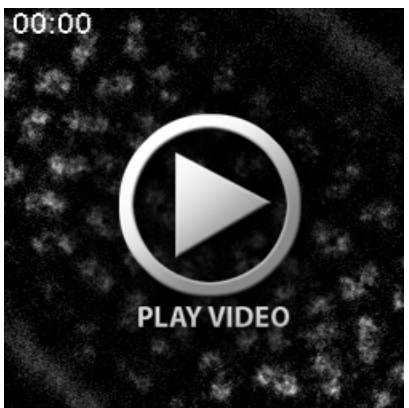

**Movie 12.**

**Table S1. Primers**

| Primer Name            | Sequence                              | TM |
|------------------------|---------------------------------------|----|
| <u>Cloning primers</u> |                                       |    |
| Dopfull NotI fwd       | CA GCGGCCGC ATGAGTCGCCAGGAGGGAGC      | 75 |
| Dopfull KpnI XbaI rev  | CT TCTAGA GGTACC CTTCTCTGCTTGGCAGCAGA | 75 |
| Delta Kinase 1 fwd     | TAGGTACCATGAGTCGCCAGGAGGGAGCT         | 68 |
| Delta Kinase 1 rev     | TAGCGGCCGCGTTGTTGGGCTCCACTGCCAG       | 68 |
| Delta Kinase 2 fwd     | CTGCGGCCGCCATGCCACTCCACGTCTACCG       | 72 |
| Delta kinase 2 rev     | GATCTAGACTTCTCTGCTTGGCAGCAGAAG        | 72 |
| dDUF2fwd               | GCGGCCGCCAGCAGGAATTAAGGGAAACACAGC     | 74 |
| dDUF1rev new           | AC GCGGCCGCCGAGTATGGGGAATGGGTTTCG     | 70 |
| dPDZ1fwd               | GGTACCATGAGTCGCCAGGAGGGAGCTG          | 72 |
| dPDZ1rev               | GCGGCCGCCACGACGTATGATGATCGGAGGC       | 72 |
| dPDZ2fwd               | GCGGCCGCCACACCAGCATCCAGAGCGGTGG       | 78 |
| dPDZ2rev               | TCTAGACTTCTCTGCTTGGCAGCAGAAGTG        | 78 |

| Primer Name               | Sequence                 |
|---------------------------|--------------------------|
| <u>Sequencing primers</u> |                          |
| CG6498_1fwd               | GTGACCGTTCGGCTGATTGAT    |
| CG6498_1 rev              | GTTGCGATTACGGGGTTTTTG    |
| CG6498_2 fwd              | AGCGCCTTGCCAGCCGTATG     |
| CG6498_2 rev              | CTGCCCCACCGCAAATGTT      |
| CG6498_3 fwd              | CAGCGGTACTTGATTTTCGGTTGG |
| CG6498_3 rev              | TTTTGCGCGTTGAGGTGGATA    |
| CG6498_4 fwd              | CGGGGTTTCAGCTGGAGGAGGTG  |
| CG6498_4 rev              | TGGCGTTTGAGGAGGCTGTTGAGG |
| CG6498_5 fwd              | CGAGGCGGCAGCTGAACTAAATG  |
| CG6498_5 rev              | AGGCGCTACCCGAACCACTACCAC |
| CG6498_6 fwd              | TTTGCCGCGTTTCTCCATCTCG   |
| CG6498_6 rev              | ATTGCCCCGCGCTGCTATTACG   |
| CG6498_7 fwd              | CAGTTCGCCCTCATCCTTTC     |
| CG6498_7 rev              | CCGCGCCCATTCTCATCAC      |
| CG6498_8 fwd              | CCATCGCGTGCCCAGGAGACT    |
| CG6498_8 rev              | GAGATGGAGAAACGCGGCAAAATG |
| CG6498_9 fwd              | CGTCCAATTGCTGCGTATGC     |
| CG6498_9 rev              | CCGGGCGGAATGTTGTGC       |
| CG6498_10 fwd             | CTTTTCGCGCAGCACACCAGA    |
| CG6498_10 rev             | GCCGCAGTCCCGCCTCAA       |
